RESEARCH PAPER

# Ethylene negatively regulates aluminium-induced malate efflux from wheat roots and tobacco cells transformed with *TaALMT1*

Qiuying Tian<sup>1</sup>, Xinxin Zhang<sup>1,4</sup>, Sunita Ramesh<sup>2</sup>, Matthew Gilliham<sup>2</sup>, Stephen D. Tyerman<sup>2</sup> and Wen-Hao Zhang<sup>1,3,\*</sup>

<sup>1</sup> State Key Laboratory of Vegetation and Environmental Change, Institute of Botany, Chinese Academy of Sciences, Beijing 100093, China

<sup>2</sup> ARC Centre of Excellence in Plant Energy Biology, School of Agriculture, Food and Wine, Waite Research Institute, University of Adelaide, Glen Osmond, SA 5064, Australia

<sup>3</sup> Research Network of Global Change Biology, Beijing Institutes of Life Science, The Chinese Academy of Sciences, Beijing, P. R. China

<sup>4</sup> Present address: Institut für Biologie und Biotechnologie der Pflanzen, Universität Münster, Schlossplatz 4, 48149 Münster, Germany

\* To whom correspondence should be addressed. E-mail: [whzhang@ibcas.ac.cn](mailto:whzhang@ibcas.ac.cn)

Received 28 January 2014; Revised 24 February 2014; Accepted 26 February 2014

## Abstract

An important mechanism for Al<sup>3+</sup> tolerance in wheat is exudation of malate anions from the root apex through activation of malate-permeable *TaALMT1* channels. Here, the effect of ethylene on Al<sup>3+</sup>-activated efflux of malate was investigated using Al<sup>3+</sup>-tolerant wheat genotype ET8, which has high expression of *TaALMT1*. Exposure of ET8 plants to Al<sup>3+</sup> enhanced ethylene evolution in root apices. Treatment with the ethylene synthesis precursor 1-aminocyclopropane-1-carboxylic acid (ACC) and ethylene gas suppressed Al<sup>3+</sup>-induced malate efflux from root apices, whereas the intracellular malate concentrations in roots were not affected. Malate efflux from root apices was enhanced in the presence of Al<sup>3+</sup> by two antagonists of ethylene biosynthesis, aminoethoxyvinylglycine (AVG) and 2-aminoisobutyric acid (AIB). An increase in Al accumulation in root apices was observed when treated with ACC, whereas AVG and AIB suppressed Al accumulation in root apices. Al<sup>3+</sup>-induced inhibition of root elongation was ameliorated by pretreatment with AIB. In addition, ethylene donor (Ethrel) also inhibited Al<sup>3+</sup>-induced malate efflux from tobacco cells transformed with *TaALMT1*. ACC and the anion-channel blocker niflumate had a similar and non-additive effect on Al-induced malate efflux from root apices. Treatment of ET8 plants with ACC enhanced expression of *TaALMT1*, suggesting that the inhibitory effect of ethylene on Al-induced malate efflux is unlikely to occur at the transcriptional level. These findings indicate that ethylene may behave as a negative regulator of Al<sup>3+</sup>-induced malate efflux by targeting *TaALMT1*-mediated malate efflux by an unknown mechanism.

**Key words:** Ethylene, aluminium tolerance, malate efflux, ALMT1, wheat (*Triticum aestivum* L.).

## Introduction

Aluminium (Al) is the most abundant metal in the Earth's crust. Fortunately, the majority of Al occurs in the non-toxic form of aluminosilicate. However, Al is hydrolysed into phytotoxic Al<sup>3+</sup> cations in acidic environments, and becomes a major constraint for crop growth and yield in acid soils

(Kochian, 1995). Inhibition of root elongation is one of the earliest and most distinct symptoms of Al<sup>3+</sup>-toxicity that can be easily observed in solution culture (Zhang and Rengel, 1999). Although Al<sup>3+</sup> can induce a rapid change in cell division in maize (Doncheva *et al.*, 2005), the rapid suppression of

root elongation by  $\text{Al}^{3+}$  within 1 h of exposure to  $\text{Al}^{3+}$  (Zhang and Rengel, 1999) suggests that  $\text{Al}^{3+}$ -induced inhibition of root growth probably results from arrest of cell elongation (Horst, 1995; Matsumoto, 2000). It has been established that the root apex, particularly the distal transition zone, is a critical site for perception of  $\text{Al}^{3+}$  and in determining whether a plant exhibits tolerance to  $\text{Al}^{3+}$  (Ryan *et al.*, 1993; Sivaguru and Horst, 1998). Extensive studies have demonstrated that numerous molecular and physiological processes are targeted by  $\text{Al}^{3+}$ , such as  $\text{Ca}^{2+}$ -dependent signalling cascades, cytoskeleton dynamics (see reviews of Matsumoto, 2000; Rengel and Zhang, 2003), phytohormones (auxin, Kollmeier *et al.*, 2000; Illes *et al.*, 2006; Shen *et al.*, 2008; ethylene, Sun *et al.*, 2010), and nitric oxide (Wang and Yang 2005; Illes *et al.*, 2006; Tian *et al.*, 2007). However, the primary mechanisms underlying  $\text{Al}^{3+}$  toxicity in plants remain largely controversial and elusive.

In contrast to  $\text{Al}^{3+}$  toxicity, substantial progress has been made in our understanding of  $\text{Al}^{3+}$  tolerance (see reviews of Ryan *et al.*, 2011; Delhaize *et al.*, 2012). An important tolerance mechanism is the exudation of carboxylic anions (malate, citrate, oxalate) that can complex extracellular  $\text{Al}^{3+}$  (Ryan *et al.*, 2001; Ryan *et al.*, 2011; Ma *et al.*, 2001). In wheat, malate is exuded from the root apex upon exposure to  $\text{Al}^{3+}$  (Delhaize *et al.*, 1993b; Ryan *et al.*, 1995). Further studies have revealed that  $\text{Al}^{3+}$ -induced exudation of malate is mediated by anion channels permeable to malate (Ryan *et al.*, 1997; Zhang *et al.*, 2001, 2008). Sasaki *et al.* (2004) identified that a membrane protein ALMT1 underpins the  $\text{Al}^{3+}$ -induced malate exudation from root apices in wheat. Heterologous expression of the *TaALMT1* gene in *Xenopus oocytes* and in tobacco BY2 cells revealed the kinetic properties of malate transport (Sasaki *et al.*, 2004; Zhang *et al.*, 2008 Piñeros *et al.*, 2008). When expressed in barley (Delhaize *et al.*, 2004) and tobacco BY2 cells (Sasaki *et al.*, 2004; Zhang *et al.*, 2008), *TaALMT1* conferred an  $\text{Al}^{3+}$ -activated efflux of malate that improved resistance to  $\text{Al}^{3+}$ . Transporters homologous to ALMT1 have been identified to mediate  $\text{Al}^{3+}$ -induced malate efflux in species such as *Arabidopsis thaliana* (Hoekenga *et al.*, 2006), rye (Collins *et al.*, 2008), barley (Gruber *et al.*, 2011), *Brassica napus* (Ligaba *et al.*, 2006), and soybean (Liang *et al.*, 2013). The function and regulation of *TaALMT1* have been characterized at both transcriptional and post-transcriptional levels. For instance, the promoter characteristics (Sasaki *et al.*, 2006; Ryan *et al.*, 2010), membrane topology (Motoda *et al.*, 2007), N-terminal and C-terminal domains (Ligaba *et al.*, 2013; Furuichi *et al.*, 2010), and putative protein phosphorylation sites have been shown to be involved in regulating the function of *TaALMT1* (Osawa and Matsumoto, 2001; Ligaba *et al.*, 2009). Although numerous studies have investigated the mechanisms of  $\text{Al}^{3+}$ -induced malate efflux mediated by ALMT1, it is unclear how  $\text{Al}^{3+}$  activates the ALMT1 channels (Furuichi *et al.*, 2010; Ryan *et al.*, 2011; Ligaba *et al.*, 2009, 2013).

Our previous studies revealed that  $\text{Al}^{3+}$  evokes ethylene evolution from root apices of *Lotus japonicas* (Sun *et al.*,

2007) and *Arabidopsis* (Sun *et al.*, 2010). In vascular plants, ethylene is produced from methionine through *S*-adenosyl-L-methionine and 1-aminocyclopropane-1-carboxylic acid (ACC), catalysed by ACC synthase (ACS) and ACC oxidase (ACO), respectively (Kende, 1993). We demonstrated that the  $\text{Al}^{3+}$ -induced suppression of root elongation is negatively correlated with  $\text{Al}^{3+}$ -elicited ethylene production, such that inhibition of ethylene biosynthesis with antagonists markedly alleviates the inhibitory effect of  $\text{Al}^{3+}$  on root growth (Sun *et al.*, 2007). In *Arabidopsis*, we further demonstrated that the  $\text{Al}^{3+}$ -induced ethylene may act as a signal to alter auxin distribution by targeting PIN2 and AUX1, leading to suppression of root growth (Sun *et al.*, 2010). There is emerging evidence indicating that ethylene is involved in regulation of several membrane transporters at the transcriptional level, including both high- and low-affinity nitrate transporters in *Arabidopsis* (Tian *et al.*, 2009) and oilseed rape (Leblanc *et al.*, 2008), a high-affinity potassium transporter in *Arabidopsis* (Jung *et al.*, 2009), high-affinity phosphate transporters in *Arabidopsis* (Lei *et al.*, 2011) and *Medicago falcata* (Li *et al.*, 2011), and an iron transporter in *Arabidopsis* (Garcia *et al.*, 2010). In addition to regulation of nutrient transporters at the transcriptional level, ethylene can activate  $\text{Ca}^{2+}$ -permeable cation channels, leading to an increase in cytosolic  $\text{Ca}^{2+}$  activity in tobacco BY2 cells (Zhao *et al.*, 2007). Given that  $\text{Al}^{3+}$  triggers ethylene production in roots of some plants and ethylene can regulate some ion channels, we explored the possibility that ethylene may be involved in regulation of Al tolerance by targeting ALMT1-mediated malate efflux. Our results showed that  $\text{Al}^{3+}$ -induced malate efflux from root apices and *TaALMT1*-expressing tobacco BY2 cells was correlated with ethylene production, suggesting the regulatory role of ethylene in *TaALMT1*-dependent tolerance to  $\text{Al}^{3+}$ .

## Materials and methods

### *Plant materials and growth conditions*

Seeds of ET8, the Al-tolerant genotype of wheat *Triticum aestivum* L. (Delhaize *et al.*, 1993b), were surface-sterilized by incubation for 1 min in 75% ethanol, rinsed with sterile distilled water followed by exposure to 10% (v/v) sodium hypochlorite for 20 min, and then washed with sterile water. The seeds were transferred to 100 ml flasks (10 seeds/flask) containing 40 ml sterile 0.2 mM  $\text{CaCl}_2$ , pH 4.5 (control solution). Seed germination occurred during incubation at 22–28 °C for 4–5 d on an orbital shaker set at 100 rpm.

### *Determination of ethylene production*

Roots of five-day-old seedlings were exposed to solutions containing 0, 50, and 200  $\mu\text{M}$   $\text{AlCl}_3$  (pH 4.5) with basal composition of 0.2 mM  $\text{CaCl}_2$  for 2 h, before root apices (about 2 cm long) of about 0.3 g were excised. To minimize the wounding effect, the excised roots were placed into 5 ml gas-tight vials containing 0.5 ml of agar medium (0.7% agar) for 1 h, and then the vials were sealed with a gas-tight stopper. The excised roots were kept moist during the 1-h period. One millilitre of headspace gas was taken from the vials after 1 h collection time and injected into a gas chromatograph (GC) equipped with an alumina column (GDX502) and a flame ionization detector (GC-7AG; Shimadzu Japan) for determination of the ethylene concentration.

### Staining Al by haematoxylin and determination of Al in root apices

Al distribution in root apices was visualized using Lumogallion following protocols described by Delhaize *et al.* (1993a). Briefly, root apices were first exposed to 0  $\mu\text{M}$  and 10  $\mu\text{M}$  1-aminocyclopropane-1-carboxylic acid (ACC) for varying durations, and then incubated in 20  $\mu\text{M}$   $\text{AlCl}_3$  (pH 4.5) for 30 min. After rinsing thoroughly with deionized water, they were transferred to 100 ml solutions containing 0.2 g haematoxylin and 2 mg KIO for 30 min. The roots were photographed after being washed with deionized water.

To examine the effect of ethylene on Al accumulation, five-day-old wheat seedlings were first exposed to either 10  $\mu\text{M}$  aminoethoxyvinylglycine (AVG) or 50  $\mu\text{M}$  2-aminoisobutyric acid (AIB) for 6 h and then incubated in 20  $\mu\text{M}$   $\text{AlCl}_3$  for 30 min. Control roots that were not treated with AVG and AIB were also exposed to an identical Al solution. Al contents in root apices were determined following the protocols used by Rangel *et al.* (2007). Briefly, about 20 root apices that were thoroughly rinsed with 0.2 mM  $\text{CaCl}_2$  (pH 4.5) were transferred into 2 ml Eppendorf reaction vials and digested in 500  $\mu\text{l}$  ultra-pure  $\text{HNO}_3$  (65%) on a rotary shaker for 24 h. The digestion was completed by heating the samples in a water bath at 80  $^\circ\text{C}$  for 20 min. Samples were diluted by addition of 1.5 ml distilled water after cooling. All samples were passed through a 0.45  $\mu\text{m}$  filter (Millipore, USA). Al concentration in the extract solution was measured by Inductively Coupled Plasma Emission Spectrometer (ICP-OES, Thermo Electron Corporation, USA)

### Determination of malate efflux and intracellular malate contents

Malate exudation from root apices was determined according to the method of Ryan *et al.* (1995) with minor modifications. Root apices (1 cm) were excised with a razor blade from plants incubated in control solution (0.2 mM  $\text{CaCl}_2$ , pH 4.5). Thirty root-apices for each measurement were transferred into 5 ml vials and washed three times with control solution to remove malate released from the cut surface. Excised root apices were exposed to control solution and to solutions supplemented with 10  $\mu\text{M}$  ACC for 2 h, and then incubated in 1 ml solution containing 20  $\mu\text{M}$   $\text{AlCl}_3$  for another 2 h. During the treatment, the vials were placed on a reciprocal shaker (100 rpm). After 2 h, the solution was collected for malate analysis. To determine the effect of ethylene gas on malate efflux, the excised root apices were transferred into 5 ml vials containing 0.15 ml control solution. The solubility of ethylene in solution is very low, thus a minimum volume of solution was used to maximize effective ethylene concentration. The vials were sealed and 1 ml ethylene gas (500 ppm) or air was injected into the vials. After treatment for 2 h, root apices were exposed to 0 or 200  $\mu\text{M}$   $\text{AlCl}_3$  for another 2 h. To study the effect of ethylene synthesis inhibitors AVG and AIB on malate efflux, roots were incubated in solutions containing 10  $\mu\text{M}$  AVG and 50  $\mu\text{M}$  AIB for 6 h. Root apices were excised and placed into vials containing 1 ml 200  $\mu\text{M}$   $\text{AlCl}_3$  to collect malate for 1 h. To determine the additive effect of ACC and the anion channel blocker niflumic acid (NA), thirty root apices were treated with 1 ml solutions containing various concentrations of NA (0, 2, 5, 10, 20  $\mu\text{M}$ ) or ACC (0, 5, 10, 15, 20, 30, 50  $\mu\text{M}$ ) and 200  $\mu\text{M}$   $\text{AlCl}_3$  for 1 h.

Malate concentrations of the exudation solution were determined following protocols used by Delhaize *et al.* (1993b). One ml sample solution was incubated with 1 ml buffer (0.5 M Gly, 0.4 M hydrazine, pH 9.0) and 0.1 ml NAD. After 5 min, the reaction solutions were used to determine the absorption at 340 nm (the first  $A_{340}$ ). The reaction mixture was then incubated for 40 min after the addition of 5  $\mu\text{l}$  malate dehydrogenase (MDH). The production of NADH leads to the increase in  $A_{340}$ . The change of  $A_{340}$  before and after addition of MDH was used to calculate malate content.

Malate efflux from tobacco BY2 cells was measured as described by Zhang *et al.* (2008). BY2 cells (*Nicotiana tabacum* L. cv. Samsun, a cell line SL) transformed with the *TaALMT1* gene from wheat, or an empty vector (Sasaki *et al.*, 2004) were grown in MS media. The transgenic BY2 cells were grown in MS media solution on a rotary

shaker until the logarithmic phase of growth. Aliquots of suspension containing approximately 1 g of cells were centrifuged and the cells were gently resuspended in 15 ml of 3 mM  $\text{CaCl}_2$  and 3 mM sucrose (pH 4.5). Aliquots were then collected and cells resuspended in the above solution treated with or without added treatments at approximately 0.15 g FW per 10 ml. Treatments included 10  $\mu\text{M}$  Ethrel, 100  $\mu\text{M}$   $\text{AlCl}_3$  (pH 4.5) or 10  $\mu\text{M}$  Ethrel plus 100  $\mu\text{M}$   $\text{AlCl}_3$  (pH 4.5) for 60 min. After the treatment, the suspensions were centrifuged and malate concentrations in the supernatant were assayed as described above.

To measure malate concentrations in root apices, thirty root apices were homogenized in liquid  $\text{N}_2$  and extracted using a pestle in 1 ml of ice-cold 0.6 N perchloric acid after washing thoroughly with control solutions. The extract was centrifuged at 15000  $\times g$  for 5 min and 0.9 ml of supernatant solution was collected and neutralized with 80  $\mu\text{l}$  of  $\text{K}_2\text{CO}_3$  (69 g 100 ml<sup>-1</sup>). The solution was centrifuged at 15000  $\times g$  for 5 min. The contents of malate were assayed as described above after mixing 0.5 ml of the supernatant with 0.5 ml distilled water.

### Measurements of root elongation

Roots of 5-day-old seedlings were exposed to solutions containing different concentrations of  $\text{AlCl}_3$  (0, 10, 20, 50, 100  $\mu\text{M}$ , pH 4.5) or ACC (0, 0.01, 0.1, 1, 10  $\mu\text{M}$ , pH 4.5) for 24 h. Root elongation was determined by a ruler ( $\pm 0.5$  mm) before and after treatments. To study the short-term effect of  $\text{AlCl}_3$  and ACC on root elongation, ET8 seedlings were incubated in control solution and solutions containing 10  $\mu\text{M}$  ACC or 20  $\mu\text{M}$   $\text{AlCl}_3$  (pH 4.5) for 1 h, and root length was measured under a microscope (SZX12, OLYMPUS, Japan) before and after treatments. To measure the effect of ethylene synthesis inhibitors (AVG, AIB) on root elongation, roots of 5-day-old seedlings were pretreated with control solution or solutions containing 10  $\mu\text{M}$  AVG or 50  $\mu\text{M}$  AIB for 6 h, and then exposed to 0  $\mu\text{M}$  or 20  $\mu\text{M}$   $\text{AlCl}_3$  (pH 4.5) for another 2 h. Root length was measured under microscope before and after exposure to  $\text{AlCl}_3$ .

### Analysis of *TaALMT1* gene expression

Real-time PCR was used to study the expression patterns of *TaALMT1* in ET8 in response to  $\text{AlCl}_3$  and ACC. After exposure of ET8 to  $\text{AlCl}_3$  (20  $\mu\text{M}$ ) or ACC (10  $\mu\text{M}$ ) for varying time periods (0, 2, 6, 24 h), approximately 50 root apices were excised and frozen in liquid  $\text{N}_2$ . RNA was isolated using RNAiso Plus reagent (TaKaRa). The RNA was reverse-transcribed into first-strand cDNA with PrimeScript RT reagent Kit (TaKaRa): 0.5  $\mu\text{g}$  of total RNA, 1  $\mu\text{l}$  of 5 $\times$ DNA Eraser Buffer, 0.5  $\mu\text{l}$  of gDNA Eraser, and DEPC- $\text{H}_2\text{O}$  to 5  $\mu\text{l}$ . The solution was incubated at 42  $^\circ\text{C}$  for 2 min to remove any contaminating genomic DNA. Each reaction was adjusted to 10  $\mu\text{l}$  by adding 2.0  $\mu\text{l}$  of 5 $\times$ Primer Script buffer, 0.5  $\mu\text{l}$  Primer Script RT Enzyme Mix I, 0.5  $\mu\text{l}$  RT-Primer Mix, and DEPC- $\text{H}_2\text{O}$ . The reverse-transcription was performed for 30 min at 37  $^\circ\text{C}$  and terminated at 85  $^\circ\text{C}$  for 5 s. Three endogenous genes *TaActin*, *TaTubulin*, and *TaGAPDH* were used as control genes. *TaALMT1* expression relative to the control genes was determined by real-time quantitative RT-PCR (qRT-PCR) on an ABI StepOne Plus instrument. Each reaction contained 5.0  $\mu\text{l}$  2 $\times$ Ultrasybr Mixture (With ROX) reagent (Cwbi), 1.5  $\mu\text{l}$  cDNA samples, and 1.2  $\mu\text{l}$  of 10 mM gene-specific primers in a final volume of 10  $\mu\text{l}$ . Thermocycling conditions were 95  $^\circ\text{C}$  for 10 min followed by 40 cycles of 95  $^\circ\text{C}$  for 30 s, 55  $^\circ\text{C}$  for 30 s, and 72  $^\circ\text{C}$  for 30 s. The primers used for real-time PCR of *TaALMT1* were those used by Sasaki *et al.* (2006): 5'-AAGAGCGTCCTTAATTCG-3' and 5'-CCTTACATGATAGCTCAGGG-3'. Three endogenous genes of *TaActin*, *TaTubulin*, and *TaGAPDH* were amplified with the following primers: *TaActin*-F (5'-CTATCCTTCGTTTGACCTT-3'), *TaActin*-R (5'-AGCGAGCTTCTCCTTTATGT-3'), *TaTubulin*-F (5'-TCCATGTGCTCGACTGGTGC-3'), *TaTubulin*-R (5'-TCC TCGTAGTCCTTCCCTCCAG-3'), *TaGADPH*-F (5'-GTTGA

GGGTTTGTGACCAC-3'), TaGADPH-R (5'-TCGGACTCC TCCTTGATAGC-3'). Sequencing of PCR products was used to confirm whether the primers amplified the target genes. Three biological and three technological repeats were performed in RT-PCR. The relative expression level was analysed by the comparative  $C_T$  method.

## Results

### *Al-stimulated ethylene evolution from root apices*

To establish a link between ethylene and  $Al^{3+}$ -induced malate efflux from wheat root apices, the effect of  $Al^{3+}$  on ethylene evolution from excised root apices of ET8 plants was determined. Similar to *L. japonicas* (Sun *et al.*, 2007) and *A. thaliana* (Sun *et al.*, 2010), exposure of 5-day-old ET8 seedlings to solutions containing 50 and 200  $\mu M$   $AlCl_3$  for 2 h (pH 4.5) led to an increase in ethylene evolution above control levels (Fig. 1). The magnitude of ethylene evolution from root apices was positively dependent on  $Al^{3+}$  concentrations, such that an increase in ethylene evolution was increased by 33.6% and 65.0% after treatment with 50 and 200  $\mu M$   $AlCl_3$ , respectively.

### *Ethylene inhibited $Al^{3+}$ -induced malate efflux from root apices*

Previous studies revealed that  $Al^{3+}$  can induce a rapid malate efflux from ET8 root apices (Ryan *et al.*, 1995). The observation that  $Al^{3+}$  also increased ethylene production in root apices of ET8 seedlings prompted us to examine whether the  $Al^{3+}$ -induced ethylene is involved in regulation of malate efflux from root apices. To evaluate the role of ethylene in malate efflux from wheat root apices, we first examined the effect of ethylene biosynthesis precursor ACC on malate efflux. As shown in Fig. 2A, ACC abolished the basal level of malate efflux from root apices. A marked increase in malate efflux

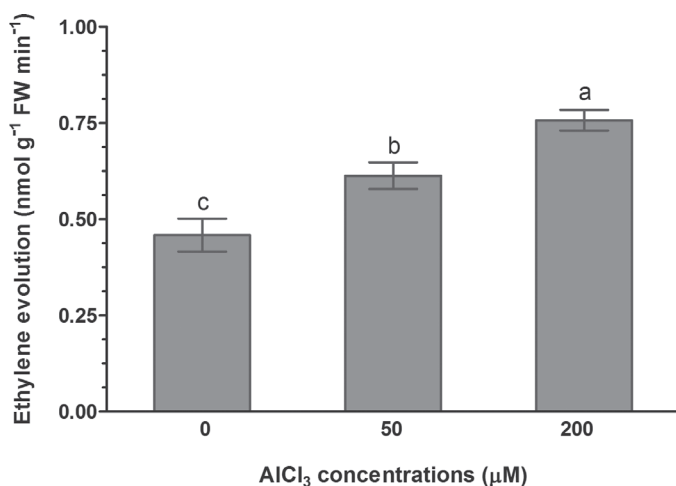

**Fig. 1.** The effect of Al on ethylene evolution in root apices of Al-tolerant ET8 wheat plants. ET8 seedlings were exposed to 0, 50, and 200  $\mu M$   $AlCl_3$  (pH 4.5) for 2 h, and the ethylene concentrations were measured by gas chromatography. The control solution contained 0.2 mM  $CaCl_2$  (pH 4.5). Data are the mean  $\pm$  SE of four replicates. Data with different letters indicate significant different ( $P < 0.05$ ) between treatments.

from root apices was observed upon exposure to  $Al^{3+}$ , and the  $Al^{3+}$ -induced malate efflux was significantly suppressed by ACC (Fig. 2A). To validate that the inhibitory effect of ACC on Al-induced malate efflux is related to ethylene, the effect of ethylene gas on  $Al^{3+}$ -induced malate efflux from ET8 root apices was further studied by exposing the roots to ethylene gas before treatment of roots with  $Al^{3+}$ . Similar to ACC treatment, there was a significant reduction in  $Al^{3+}$ -induced malate efflux from root apices when treated with ethylene gas (Fig. 2B). ACS and ACO are two key enzymes catalysing ethylene production in vascular plants. In contrast to ACC and ethylene gas, AVG and AIB (ACS and ACO inhibitors, respectively), stimulated  $Al^{3+}$ -induced malate efflux from root apices (Fig. 2C), whereas AVG and AIB had no effect on malate efflux from root apices in the absence of  $Al^{3+}$  (Fig. 2C). These results suggest that ethylene may negatively regulate  $Al^{3+}$ -induced malate efflux from wheat roots.

### *Ethylene and niflumic acid had similar effect on $Al^{3+}$ -induced malate efflux*

It has been shown that  $Al^{3+}$ -induced malate efflux is mediated by anion channels (Ryan *et al.*, 1997; Zhang *et al.*, 2001, 2008). The anion channel blocker niflumic acid (NA) inhibits  $Al^{3+}$ -induced malate efflux from wheat root apices (Ryan *et al.*, 1995) and blocks malate-permeable channels (Zhang *et al.*, 2001, 2008). The effect of NA and ACC on  $Al^{3+}$ -induced malate efflux from ET8 root apices was compared by analysing their dose-response curves. Our results show that both NA and ACC inhibited  $Al^{3+}$ -induced malate efflux, and the  $IC_{50}$  (concentration of inhibitor producing 50% inhibition) values for NA and ACC were not significantly different (Fig. 3A, B). However the extent of inhibition was larger for NA (72.1%) compared with ACC (31.0%). Moreover, there was no additive effect of ACC and NA on  $Al^{3+}$ -induced malate efflux, as treatment with NA had an identical effect on malate efflux to treatment with NA and ACC together (Fig. 3C). These results suggest the inhibition of  $Al^{3+}$ -activated malate efflux by ethylene may result from blockade of malate-permeable anion channels.

### *Intracellular malate concentrations in roots were not affected by ethylene*

In addition to malate efflux, we also determined the effect of ACC and ethylene synthesis inhibitors (AVG, AIB) on intracellular malate concentrations of ET8 root apices. Our results showed no effect of ACC, AVG, and AIB on malate concentrations in ET8 root apices (Fig. 4). These results reveal that ethylene negatively regulates  $Al^{3+}$ -induced malate efflux from ET8 root apices.

### *Ethylene inhibited $Al^{3+}$ -induced malate efflux from transgenic tobacco suspension cells*

Previous studies showed that expression of TaALMT1 in tobacco suspension cells resulted in  $Al^{3+}$ -induced malate efflux (Zhang *et al.*, 2008). To further evaluate the role of

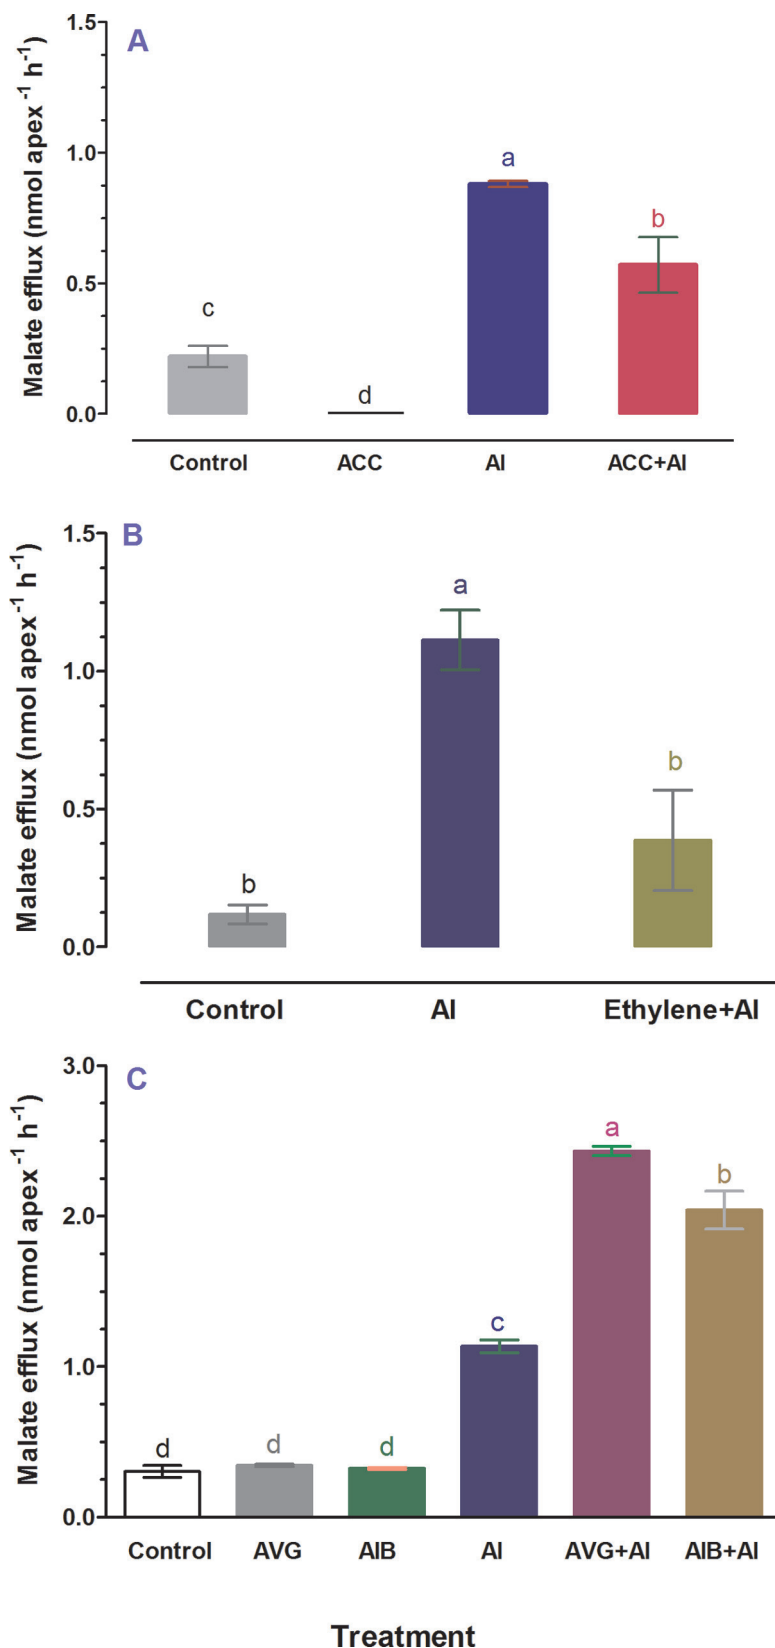

**Fig. 2.** Effect of ethylene biosynthesis precursor (ACC), ethylene gas ( $C_2H_4$ ), ethylene synthesis inhibitors (AVG, AIB) and Al on malate efflux from the root apex. (A) Thirty root apices (1 cm in length) of five-day-old seedlings were exposed to  $200 \mu M AlCl_3$  for 2 h after first being incubated for 2 h in and/or  $10 \mu M$  ACC. (B) Thirty root apices were transferred to 5 ml gas-tight vials containing  $100 \text{ nl ml}^{-1}$  ethylene gas for 2 h and then incubated to  $200 \mu M AlCl_3$  for 2 h. (C) Root apices were exposed to  $200 \mu M AlCl_3$  for 1 h, after seedlings were incubated in  $10 \mu M$  AVG and  $50 \mu M$  AIB for 6 h. The malate in solution was measured by enzyme method. Data are the means  $\pm$  SE of four replicates. The different letters indicate significant difference at  $P < 0.05$  tested with SAS Software.

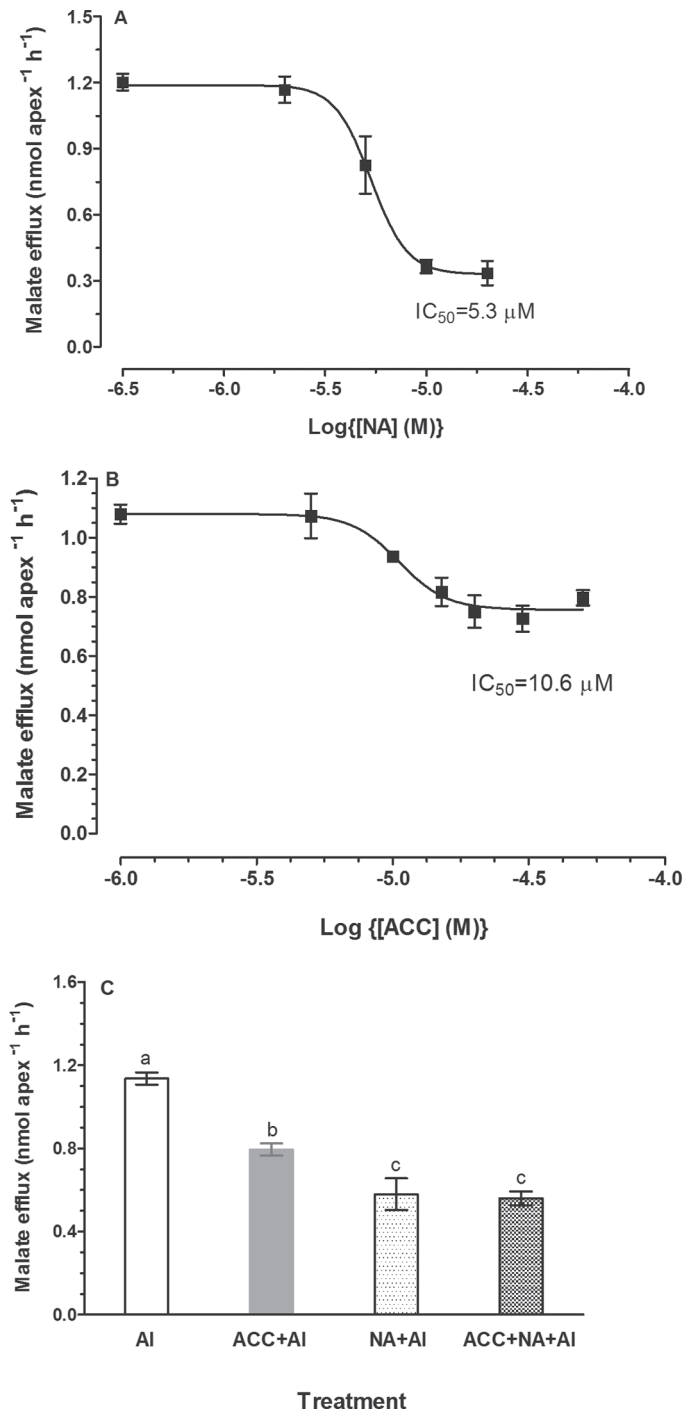

**Fig. 3.** Effect of anion channel blocker (NA), ethylene biosynthesis precursor (ACC), and AI on malate efflux in root apices of ET8 plants. (A) Excised root apices from five-day-old seedlings were washed in control solution and treated for 1 h in solutions containing 200  $\mu\text{M}$   $\text{AlCl}_3$  and various concentrations of NA (0, 2, 5, 10, 20  $\mu\text{M}$ ). (B) Root apices were exposed to 200  $\mu\text{M}$   $\text{AlCl}_3$  and various concentrations of ACC (0, 5, 10, 15, 30  $\mu\text{M}$ ) for 1 h. (C) Root apices were incubated in solutions containing 11  $\mu\text{M}$  ACC, 9  $\mu\text{M}$  NA and 200  $\mu\text{M}$   $\text{AlCl}_3$  for 1 h. Data are the means  $\pm$  SE of four replicates. The different letters indicate significant difference at  $P < 0.05$  tested with SAS Software.

ethylene in regulation of  $\text{Al}^{3+}$ -dependent malate efflux, malate efflux from tobacco suspension cells exposed to AI and ethylene was determined. Malate efflux from the transgenic tobacco cells was significantly enhanced by exposure to

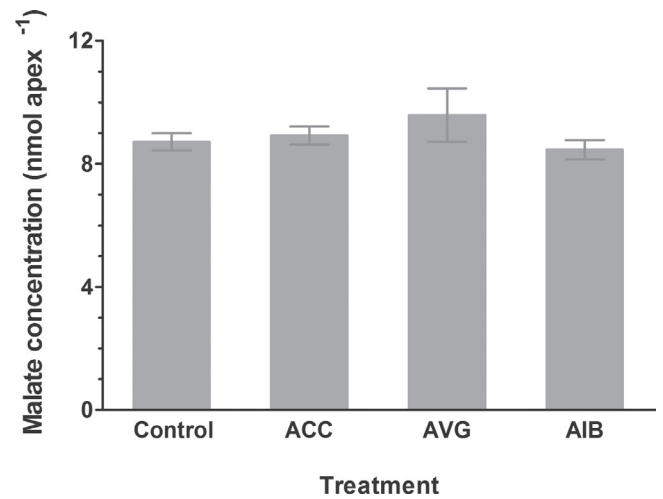

**Fig. 4.** Effect of ACC, AVG, and AIB on malate concentrations of root apices. ET8 seedlings were grown in control solution for 5 d, then transferred to 10  $\mu\text{M}$  ACC (ethylene biosynthesis precursor), 10  $\mu\text{M}$  AVG, and 50  $\mu\text{M}$  AIB (ethylene synthesis inhibitors) for 6 h. Root apices (1 cm length) were excised and washed by control solution for three times to measure internal malate concentrations. Data are the means  $\pm$  SE of four replicates. The same letters indicate no significant difference at  $P < 0.05$  tested with SAS Software.

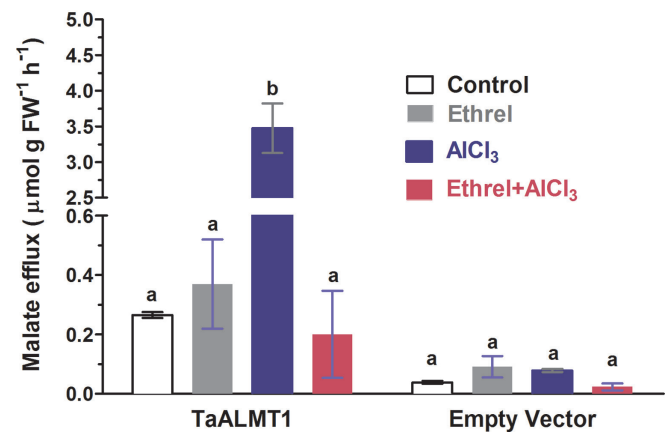

**Fig. 5.** Effect of ethylene donor Ethrel (10  $\mu\text{M}$ ) and  $\text{Al}^{3+}$  (100  $\mu\text{M}$   $\text{AlCl}_3$ ) on malate efflux from tobacco BY2 suspension cells transformed with TaALMT1 or empty vector. Control solution consisted of 3 mM  $\text{CaCl}_2$ , 3 mM sucrose, 5 mM MES/BTP, pH 4.5.  $\text{AlCl}_3$  was added in the last hour of 3-h incubation, whereas Ethrel was present for either 3 h, or for 2 h before 1 h +  $\text{AlCl}_3$ . Different letter indicates significant difference ( $P < 0.05$ ).

100  $\mu\text{M}$   $\text{AlCl}_3$  (pH 4.5), and the  $\text{Al}^{3+}$ -induced malate efflux was suppressed by 94% when the cells were pretreated with 10  $\mu\text{M}$  Ethrel (Fig. 5). A similar inhibitory effect of Ethrel on  $\text{Al}^{3+}$ -induced malate efflux from the tobacco suspension cells was also found when the suspension cells were treated with  $\text{Al}^{3+}$  and 10  $\mu\text{M}$  Ethrel simultaneously. The same concentration of Ethrel had no effect on malate efflux from the tobacco cells expressing either empty vector or TaALMT1 (Fig. 5). These results indicate that the inhibition of  $\text{Al}^{3+}$ -induced malate efflux from ET8 root apices by ethylene is likely to result from the suppression of TaALMT1-mediated malate efflux.

*Ethylene enhanced Al accumulation in root apices*

Malate released from root apices acts as a ligand to complex external  $\text{Al}^{3+}$ , thus minimizing the toxic effect of  $\text{Al}^{3+}$  on root growth by preventing accumulation of  $\text{Al}^{3+}$  in root apices (Delhaize *et al.*, 1993b). The inhibition of malate efflux by ethylene should lead to greater accumulation of Al in the root apices. To test this hypothesis, Al content in root apices was measured by staining roots with the Al-sensitive probe haematoxylin, as well as quantitatively determined Al contents in root apices by inductively coupled plasma optical emission spectrometry (ICP-OES). Figure 6 shows that Al was mainly accumulated in the quiescent zones in the absence of ACC, and that exposure of ET8 seedlings to ACC led to an enhanced accumulation of Al in these areas as well as in the differentiation zone. A similar increase in Al content in ET8 root apices after treatment with ACC was observed (Fig. 6A). Moreover, the increase in Al content in root apices by ACC pretreatment increased with increasing pretreatment time (Fig. 6B). For example, Al content in the root apices was increased by 32%, 95%, and 216% after exposure to ACC for 2, 4, and 6 h before application of Al, respectively, whereas Al content in root apices exposed to solution without ACC showed relatively lower Al content (Fig. 6B). In contrast to treatment with ACC, Al contents in root apices

were significantly reduced by AVG and AIB (Fig. 6C). The involvement of ethylene in Al accumulation in root apices was further evaluated by comparing the effect of exogenous application of malate on Al content in root apices with that of ACC. Exogenous application of malate significantly reduced Al content in root apices, whereas ACC increased the Al content (Fig. 6D). The increase in Al content by ACC was markedly suppressed by malate (Fig. 6D).

*Ethylene inhibited root elongation similar to  $\text{Al}^{3+}$* 

The most distinct symptom of  $\text{Al}^{3+}$  toxicity is inhibition of root elongation. Efflux of organic anions alleviates the  $\text{Al}^{3+}$ -induced inhibition of root growth by complexing toxic  $\text{Al}^{3+}$  in the rhizosphere. Ethylene gas and ethylene synthesis precursor ACC suppressed  $\text{Al}^{3+}$ -induced malate efflux from ET8 root apices and enhanced Al accumulation in root tips (Figs 2 and 6), suggesting that ethylene may be involved in the  $\text{Al}^{3+}$ -induced inhibition of root elongation. To test this hypothesis, we compared the effect of ACC and  $\text{AlCl}_3$  on root elongation. As shown in Fig. 7, treatment with ACC and  $\text{AlCl}_3$  for 24 h markedly suppressed root elongation. The  $\text{IC}_{50}$  values for inhibition of root elongation by  $\text{Al}^{3+}$  and ACC were 12.4  $\mu\text{M}$  and 0.04  $\mu\text{M}$ , respectively (Fig. 7A, B), suggesting that root elongation is more sensitive to ACC than  $\text{Al}^{3+}$ . A similar rapid

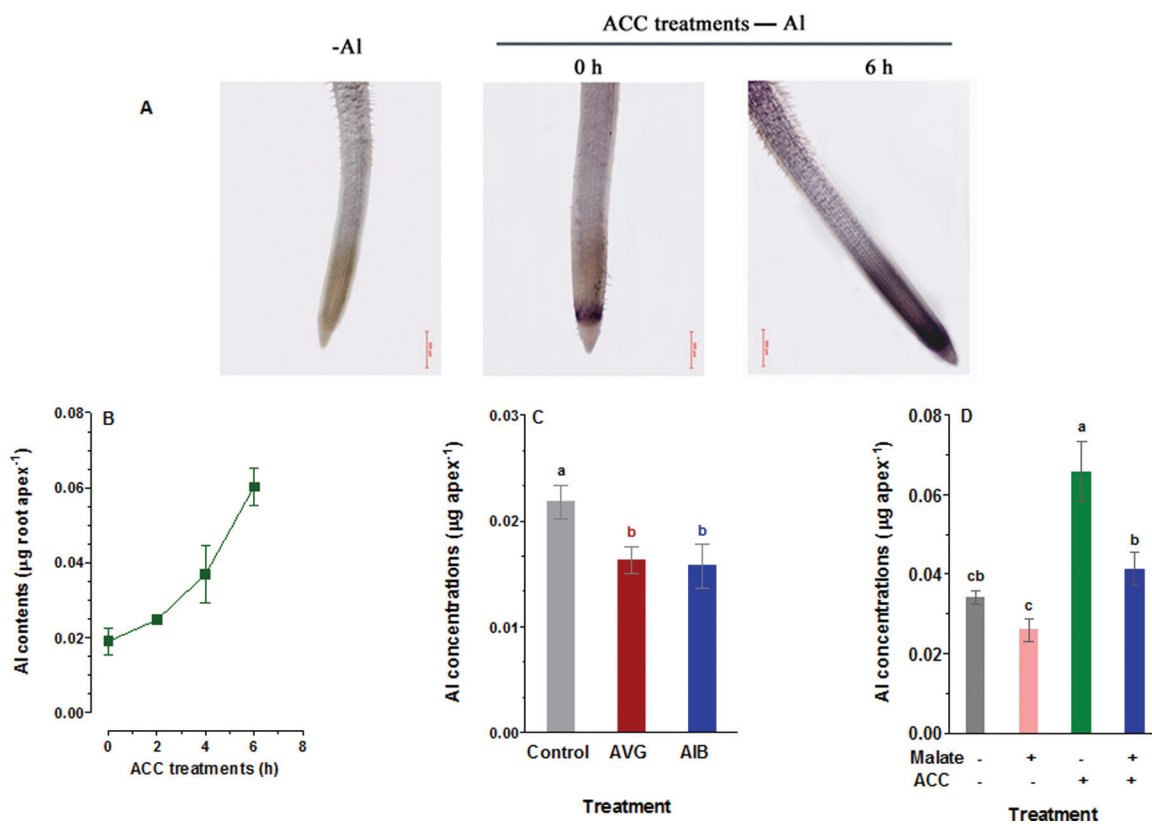

**Fig. 6.** Effect of ethylene biosynthesis precursor (ACC), ethylene synthesis inhibitors (AVG, AIB) and malate on Al accumulation in root apices. (A) ET8 seedlings were first exposed to 0  $\mu\text{M}$  and 10  $\mu\text{M}$  ACC for 6 h followed by 0  $\mu\text{M}$  and 20  $\mu\text{M}$   $\text{AlCl}_3$  for 30 min, then stained by haematoxylin. (B) Al contents in root apices were measured after being pretreated with 10  $\mu\text{M}$  ACC for varying time periods (0, 2, 4, 6 h). (C) The roots of ET8 seedlings were treated for 6 h with 10  $\mu\text{M}$  AVG and 50  $\mu\text{M}$  AIB, followed by 20  $\mu\text{M}$   $\text{AlCl}_3$  for 30 min. (D) Thirty root apices were pretreated with 10  $\mu\text{M}$  ACC and 50  $\mu\text{M}$  malate for 6 h, and exposed to 20  $\mu\text{M}$   $\text{AlCl}_3$  for 30 min. The root tips were washed for 30 min in control solution after Al treatments and then the Al concentrations were determined by ICP-OES. Data are the mean  $\pm$  SE of four replicates and bars with different letters indicate significant difference at  $P < 0.05$  tested with SAS Software.

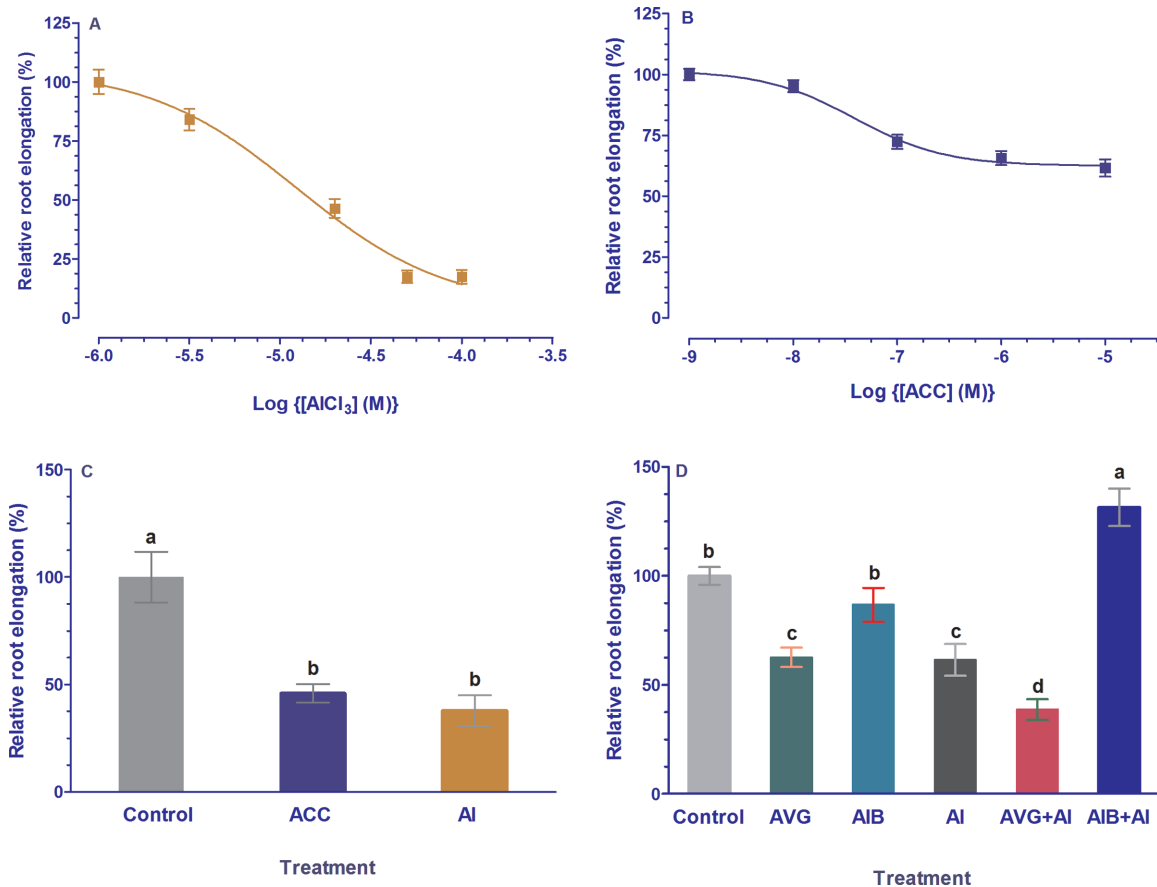

**Fig. 7.** Effect of aluminium (Al), ethylene biosynthesis precursor (ACC) and ethylene synthesis inhibitors (AVG, AIB) on root elongation of ET8. (A) Root elongation in response to various concentrations of AlCl<sub>3</sub>. Roots of 5-day-old seedlings were incubated in solutions containing different concentrations of AlCl<sub>3</sub> (0, 10, 20, 50, 100 μM) and elongation was measured by ruler after 24 h. (B) Effect of varying concentrations of ACC on root elongation. Root elongation was determined after roots were treated with different concentrations of ACC (0, 0.01, 0.1, 1, 10 μM) for 24 h. (C) Short-term effect of ACC and Al on root elongation. Five-day-old seedlings were fixed in 10-cm Petri dishes and roots were incubated for 1 h in control solution (0.2 mM CaCl<sub>2</sub>, pH 4.5) or treatment solutions containing 10 μM ACC or 20 μM AlCl<sub>3</sub>. Root elongation was measured by microscope. (D). Root elongation in response to ethylene synthesis inhibitors (AVG, AIB). Roots of five-day-old seedlings were pretreated with control solution or the solutions containing 10 μM AVG or 50 μM AIB for 6 h, and then exposed to 0 μM or 20 μM AlCl<sub>3</sub> for another 2 h. Root elongation were measured after exposing to AlCl<sub>3</sub> for 2 h by microscope. Values are given as means ± SE of at least eight independent measurements. The different letters indicate significant difference at  $P < 0.05$  tested with SAS.

inhibition of root elongation by ACC also occurred. For instance, root elongation was inhibited by 54% and 62% after exposure to 10 μM ACC and 20 μM ACC (pH 4.5), respectively, for 1 h (Fig. 7C). Root elongation was inhibited by AVG and Al<sup>3+</sup> when treated alone, whereas AIB had no effect on root elongation in the absence of Al<sup>3+</sup> (Fig. 7D). However, pretreatment of wheat roots with AIB reversed Al<sup>3+</sup>-induced inhibition of root elongation, leading to greater root elongation than control roots that were exposed to control solution (Fig. 7D). In contrast, pretreatment with AVG potentiated Al<sup>3+</sup>-induced suppression of root elongation (Fig. 7D).

#### Ethylene up-regulated TaALMT1 expression

Previous studies demonstrated that *TaALMT1* was expressed constitutively in wheat roots (Sasaki et al., 2004). To test whether the suppression of Al-induced malate efflux by ethylene is related to *TaALMT1* at the transcriptional level, the effect of ACC and AlCl<sub>3</sub> on *TaALMT1* expression was investigated. As shown in Fig. 8, regardless of the reference

genes used in qRT-PCR, the expression of *TaALMT1* was enhanced after exposure to ACC, whereas expression of *TaALMT1* in ET8 root apices was not responsive to Al<sup>3+</sup> (Fig. 8). These results suggest that regulation of *ALMT1*-mediated malate efflux from wheat root apices is unlikely to occur at the transcriptional level.

## Discussion

There have been numerous studies reporting the involvement of ethylene in morphological responses of plants to nutrient deficiency and metal toxicity (Jung et al., 2009; Tian et al., 2009; Sun et al., 2007, 2010). In addition to modulation of root morphology, emerging evidence indicates ethylene may also play a regulatory role in physiological processes in response to mineral stress (Nagarajan and Smith, 2012; Iqbal et al., 2013). Our previous studies showed that Al<sup>3+</sup> evoked a rapid and marked ethylene evolution in *L. japonicus* (Sun et al., 2007) and *A. thaliana* (Sun et al., 2010). In the present



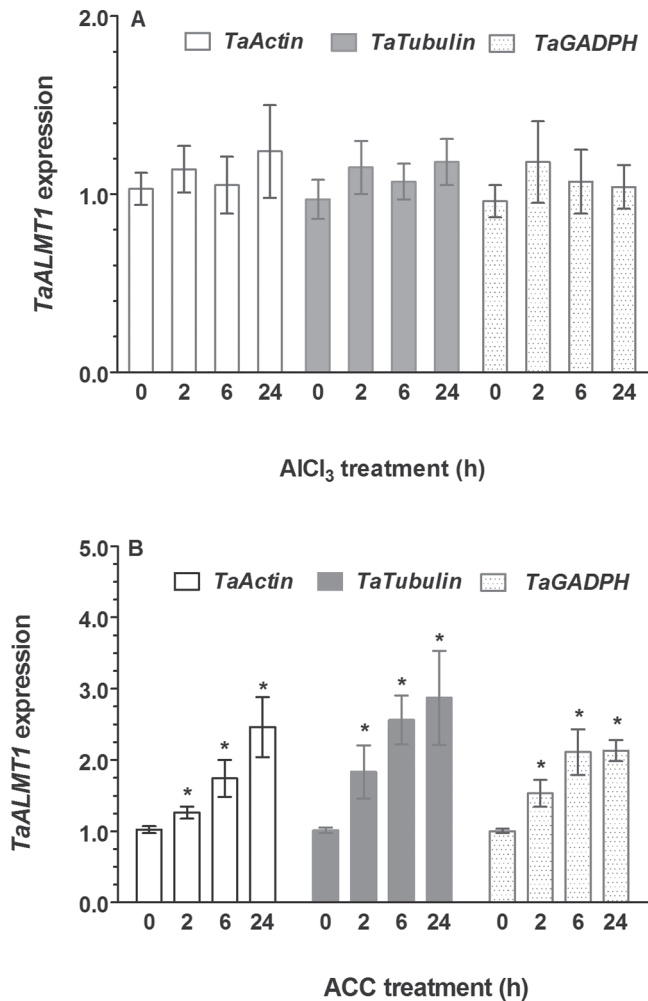

**Fig. 8.** Effect of Al (A) and ethylene biosynthesis precursor (ACC) (B) on *TaALMT1* expression of ET8 root apices. Expression of *TaALMT1* was determined after exposure of root apices to 20  $\mu\text{M}$   $\text{AlCl}_3$  and 10  $\mu\text{M}$  ACC for varying time periods (0, 2, 6, 24 h). The relative mRNA level was normalized to the mRNA in roots grown in control solution. Three reference genes, *TaActin*, *TaTubulin*, and *TaGADPH*, were used in determination of effect of ACC and Al on *TaALMT1* expression. Data are the means  $\pm$  SE of three replicates and an asterisk indicates significant difference with control at  $P < 0.05$ .

study, we found that  $\text{Al}^{3+}$  also evoked an evolution of ethylene from root apices of an Al-tolerant ET8 wheat genotype (Fig. 1). We evaluated the role of Al-induced ethylene production in the overall tolerance of ET8 to Al by experimentally manipulating the endogenous ethylene level using ethylene gas, ethylene donors, ethylene biosynthesis precursor, and ethylene synthesis inhibitors. Our results reveal that ethylene negatively regulates  $\text{Al}^{3+}$ -induced malate efflux from root apices of Al-tolerant wheat plants and from tobacco BY2 cells expressing *TaALMT1* (Figs 2 and 5). We further demonstrate that ethylene may act on the *TaALMT1* protein as shown by a similar, non-additive effect of ethylene and anion channel blocker niflumic acid on malate efflux from wheat root apices (Fig. 3). These findings, together with the observations that treatment with ethylene synthesis precursor ACC and ethylene synthesis inhibitors (AVG, AIB) enhanced and reduced accumulation of Al in the root apex, respectively (Fig. 6),

provide evidence in support of the involvement of ethylene in Al tolerance in wheat by regulating ALMT1-mediated malate efflux. The enhanced accumulation of Al in root apices treated with ACC owing to suppression of malate efflux can also account for the results that inhibition of ethylene production by antagonists of ethylene synthesis (AIB) alleviated Al-induced arrest of root elongation. Antagonist of ethylene biosynthesis AVG enhanced Al-induced malate efflux and reduced Al accumulation in root apices (Figs 2 and 6), but Al-induced suppression of root elongation was potentiated, rather than alleviated, by treatment with AVG (Fig. 7D). This observation suggests that AVG may have other effects on root elongation in addition to the inhibition of ethylene biosynthesis. A recent study shows that AVG can inhibit root growth by affecting nitrogen metabolism (Lemaire *et al.*, 2013). A similar explanation may also account for our observation in the present study. Therefore, results obtained from effects of AVG on plant growth cannot be conclusively attributed to an ethylene effect.

In a recent study, Yang *et al.* (2011) reported that  $\text{Al}^{3+}$ -induced malate efflux from root apices of ET8 wheat plants was stimulated by exogenous application of IAA, and that endogenous IAA content was enhanced owing to inhibition of IAA oxidase activity by  $\text{Al}^{3+}$ . Similar to our results, the authors found that the  $\text{Al}^{3+}$ -induced malate efflux is inhibited by antagonists of auxin polar transport (TIBA; 2,3,5-triiodobenzoic acid, and NPA; naphthylphthalamic acid), and anion channel blockers (niflumate and A-9-C) (Yang *et al.*, 2011). A close crosstalk between ethylene and auxin in regulation of root growth and development has been reported in the literature (see review of Stepanova and Alonso, 2009). Our previous results showed that ethylene evoked by  $\text{Al}^{3+}$  via up-regulating ACS and ACO at the transcriptional level may act as an up-stream signal to alter auxin transport and distribution in roots, leading to the arrest of root elongation (Sun *et al.*, 2010). Whether a similar interaction between ethylene and auxin in regulation of  $\text{Al}^{3+}$ -induced malate efflux operates warrants further investigation by experimentally manipulating ethylene and/or auxin production and distribution with antagonists of ethylene synthesis and perception, auxin polar transport and exogenous application of auxin and ethylene.

The inhibitory effect of ethylene on  $\text{Al}^{3+}$ -induced malate efflux is unlikely to occur at the transcriptional level as ACC did not suppress expression of *TaALMT1*, rather an up-regulation of *TaALMT1* in response to ACC was observed (Fig. 8). Anion channel antagonist NA that blocks  $\text{Al}^{3+}$ -activated ALMT1 channels (Zhang *et al.*, 2008) and  $\text{Al}^{3+}$ -induced malate efflux (Ryan *et al.*, 1995) exhibited similar  $\text{IC}_{50}$  value to ACC in their effect on malate efflux (Fig. 3). Moreover, we found that ethylene and NA had non-additive effect on  $\text{Al}^{3+}$ -induced malate efflux (Fig. 3). These results suggest that ethylene may act as a channel blocker to depress *TaALMT1*-mediated malate efflux. Alternatively, ethylene may regulate ALMT1 by preventing its activation by  $\text{Al}^{3+}$ . Our observation that ethylene inhibited  $\text{Al}^{3+}$ -induced malate efflux from tobacco BY2 cells expressing *TaALMT1* seems to be in line with these hypotheses. However, to elucidate the mechanisms responsible for suppression of  $\text{Al}^{3+}$ -induced malate efflux,

additional experiments will be needed such as probing the interaction between  $\text{Al}^{3+}$  and ethylene on ALMT1-mediated currents with electrophysiological techniques.

There are many reports showing that ethylene can regulate expression of genes encoding membrane transporters such as phosphate, nitrate, and iron (Li *et al.*, 2011; Tian *et al.*, 2009; Garcia *et al.*, 2010), but few studies have focused on the effect of ethylene on transport of ions at protein and cellular levels. Leblanc *et al.* (2008) showed that treatment of oilseed rape seedlings with ACC and AVG reduced and enhanced nitrate uptake, respectively, by monitoring  $^{15}\text{N}$  uptake. They suggested that a posttranscriptional regulation of nitrate transporters may be involved in the regulation of nitrate transport by ethylene (Leblanc *et al.*, 2008). Our previous study showed that ethylene can increase the concentrations of cytosolic  $\text{Ca}^{2+}$  by activating  $\text{Ca}^{2+}$ -permeable cation channel in tobacco cells (Zhao *et al.*, 2007). Although there has been no report showing the involvement of cytosolic  $\text{Ca}^{2+}$  activity in regulation of  $\text{Al}^{3+}$ -activated ALMT1-mediated malate efflux in the literature so far, we cannot rule out the possibility that inhibition of ALMT1-mediated malate efflux by ethylene may occur through changes in cytosolic  $\text{Ca}^{2+}$  activity.

Recent studies shed some lights on the mechanisms by which  $\text{Al}^{3+}$  activates anion channels. For instance, in *Arabidopsis*, upstream transcription factors *AtSTOPI* and *AtWRKY64* were reported to be involved in  $\text{Al}^{3+}$ -induced expression of *AtALMT1* (Iuchi *et al.*, 2007; Sawaki *et al.*, 2009; Ding *et al.*, 2013). In wheat,  $\text{Al}^{3+}$ -induced malate efflux is mainly controlled by ALMT1 protein, the expression of which is constitutive and not induced by Al (Sasaki *et al.*, 2004). A post-transcriptional regulation of TaALMT1 by  $\text{Al}^{3+}$  seems to be an important mechanism (Furuichi *et al.*, 2010; Ryan and Delhaize, 2010). Although the extracellular C-terminal domain is proposed to be a key site interacting directly with external  $\text{Al}^{3+}$  and the structural integrity of TaALMT1 is considered to be involved in  $\text{Al}^{3+}$ -sensing of TaALMT1, the mechanism underlying the activation of ALMT1 by  $\text{Al}^{3+}$  remains unknown (Furuichi *et al.*, 2010; Ligaba *et al.*, 2013). It is unclear whether  $\text{Al}^{3+}$  activates the ALMT1 channel directly or through signalling molecules. There is emerging evidence suggesting that reversible phosphorylation may also be involved in  $\text{Al}^{3+}$ -induced malate efflux from wheat roots (Osawa and Matsumoto, 2001) and *Arabidopsis* roots (Kobayashi *et al.*, 2007) as shown by the inhibition of Al-activated malate efflux by protein kinase inhibitors (K252a and staurosporine). Ligaba *et al.* (2009) demonstrated that malate current in *Xenopus laevis* oocytes expressing *TaALMT1* is regulated by protein kinase C-mediated phosphorylation. Moreover, Al can induce a 48 kDa protein kinase in wheat roots and coffee (*Coffea arabica*) suspension cells (Osawa and Matsumoto, 2001; Martinez-Estevéz *et al.*, 2001). It is conceivable that ethylene may regulate phosphorylation of TaALMT1 by targeting a protein kinase, because protein kinases and phosphorylation play important roles in ethylene signalling cascades (Ju *et al.* 2012). For example, five ethylene receptors identified in *Arabidopsis* possess kinase activity (Gamble *et al.*, 1998).

The receptors interact with a Raf-like protein kinase CTR1, a negative regulator of the ethylene signalling pathway (Kieber *et al.*, 1993), leading to inactivation of downstream signalling components EIN2 and EIN3 (Alonso *et al.*, 1999). Ethylene binding results in the inactivation of the receptor-CTR1 complex and the accumulation of EIN3 and EIN3-like transcription factors EILs in the nucleus (Guo and Ecker, 2003), which in turn activate and repress hundreds of genes by initiating a transcriptional cascade (Alonso *et al.*, 1999). The negative regulation of Al-dependent malate efflux by ethylene suggests that some components of ethylene signalling cascades may interact with ALMT1 directly or indirectly. Alternatively, ethylene elicited by  $\text{Al}^{3+}$  may target ALMT1 by interacting with other unknown signalling molecules, leading to the observed suppression of Al-induced malate efflux. Future work using mutants of ethylene biosynthesis and signalling and *Xenopus* oocytes expressing *TaALMT1* may unravel the molecular mechanism underlying the interaction between Al and ethylene in modulation of malate efflux.

In summary, we show that pretreatment of wheat roots with ethylene gas and ACC suppressed  $\text{Al}^{3+}$ -induced malate efflux. The suppression of Al-induced malate efflux by ethylene is likely to result from inhibition of ALMT1-mediated malate efflux as shown by a similar effect of ethylene on Al-induced malate efflux from tobacco cells expressing *TaALMT1*. The suppression of ALMT1-mediated malate efflux by ethylene may occur through post-transcriptional regulation of ALMT1 because ethylene enhanced rather than inhibited expression of *TaALMT1*. Although the mechanism by which ethylene inhibits Al-dependent malate efflux remains to be elucidated, our findings demonstrate that ethylene may be an important component in the regulation of ALMT1-dependent malate efflux. Finally, our results show that the effect of ethylene on ALMT1-dependent malate efflux occurs at the post-transcriptional level. Therefore, future research to decipher the molecular mechanisms underlying the regulation of ALMT1-dependent malate efflux by Al and ethylene at protein level is warranted.

## Acknowledgements

This study was supported by the Chinese Academy of Sciences (KSCX2-EW-Q-20), Australian Research Council, and National Science Foundation of China (31071844). State Key Laboratory of Vegetation and Environmental Change.

## References

- Alonso JM, Hirayama T, Roman G, Nourizadeh S, Ecker JR. 1999. EIN2 a bifunctional transducer of ethylene and stress responses in *Arabidopsis*. *Science* **284**, 2148–2152.
- Collins NC, Shirley NJ, Saeed M, Pallotta M, Gustafson JP. 2008. An *ALMT1* gene cluster controlling aluminium tolerance at the *Alt4* locus of rye (*Secale cereale* L.). *Genetics* **179**, 669–682.
- Delhaize E, Craig S, Beaton CD, Bennet RJ, Jagadish VC, Randall PJ. 1993a. Aluminium tolerance in wheat (*Triticum aestivum* L.) I. Uptake and distribution of aluminium in root apices. *Plant Physiology* **103**, 685–693
- Delhaize E, Ma JF, Ryan PR. 2012. Transcriptional regulation of aluminium tolerance genes. *Trends in Plant Science* **6**, 341–348.

- Delhaize E, Ryan PR, Hebb DM, Yamamoto Y, Sasaki T, Matsumoto H.** 2004. Engineering high-level aluminium tolerance in barley with the *ALMT1* gene. *Proceedings of the National Academy of Sciences, USA* **101**, 15249–15254.
- Delhaize E, Ryan PR, Randall PJ.** 1993b. Aluminium tolerance in wheat (*Triticum aestivum* L.) II. Aluminium-stimulated excretion of malic acid from root apices. *Plant Physiology* **103**, 695–702.
- Ding ZJ, Yan JY, Xu XY, Li GX, Zheng SJ.** 2013. WRKY46 functions as a transcriptional repressor of *ALMT1*, regulating aluminum-induced malate secretion in *Arabidopsis*. *Plant Journal* **76**, 825–835.
- Doncheva S, Amenos M, Poschenrieder C, Barcelo J.** 2005. Root cell patterning: a primary target for aluminium toxicity in maize. *Journal of Experimental Botany* **56**, 1213–1220.
- Furuichi T, Sasaki T, Tsuchiya Y, Ryan PR, Delhaize E, Yamamoto Y.** 2010. An extracellular hydrophilic carboxy-terminal domain regulates the activity of TaALMT1, the aluminium-activated malate transport protein of wheat. *Plant Journal* **64**, 47–55.
- Gamble RL, Coonfield ML, Schaller GE.** 1998. Histidine kinase activity of the ETR1 ethylene receptor from *Arabidopsis*. *Proceedings of the National Academy of Sciences, USA* **95**, 7825–7829.
- Garcia MJ, Lucenna C, Romera FJ, Alcantara E, Perez-Vicente R.** 2010. Ethylene and nitric oxide involvement in the up-regulation of key genes related to iron acquisition and homeostasis in *Arabidopsis*. *Journal of Experimental Botany* **61**, 3885–3899.
- Gruber BD, Delhaize E, Richardson AE, Roessner U, James RA, Howitt SM, Ryan, PR.** 2011. Characterization of HvALMT1 function in transgenic barley plants. *Functional Plant Biology* **38**, 163–175.
- Guo H, Ecker JR.** 2003. Plant responses to ethylene gas are mediated by SCF<sup>EBF1/EBF2</sup>-dependent proteolysis of EIN3 transcription factor. *Cell* **115**, 667–677.
- Hoekenga OA, Maron LG, Cançado GMA, Shaff J, Kobayashi Y, Ryan PR, Dong B, Delhaize E, Sasaki T, Matsumoto H, Yamamoto Y, Koyama H, Kochian LV.** 2006. AtALMT1 (At1g08430) is a novel, essential factor for aluminium tolerance in *Arabidopsis thaliana* and encodes an aluminium-activated malate transporter. *Proceedings of the National Academy of Sciences, USA* **103**, 9734–9743.
- Horst WJ.** 1995. The role of the apoplast in aluminium toxicity and resistance of higher plants: a review. *Zeitschrift für Pflanzenernährung und Bodenkunde* **158**, 419–428.
- Illes P, Schlicht M, Pavlovkin J, Lichtscheidl I, Baluska F, Ovecka M.** 2006. Aluminium toxicity in plants: internalization of aluminium into cells of the transition zone in *Arabidopsis* root apices relates to changes in plasma membrane potential, endosomal behaviour, and nitric oxide production. *Journal of Experimental Botany* **57**, 4201–4213.
- Iqbal N, Trivellini A, Masood A, Ferrante A, Khan NA.** 2013. Current understanding on ethylene signaling in plants: The influence of nutrient availability. *Plant Physiology and Biochemistry* **73**, 127–138.
- Iuchi S, Koyama H, Iuchi A, Kobayashi Y, Kitabayashi S, Ikka T, Hirayama T, Shinozaki K, Kobayashi M.** 2007. Zinc finger protein STOP1 is critical for proton tolerance in *Arabidopsis* and co-regulates a key gene in aluminium tolerance. *Proceedings of the National Academy of Sciences, USA* **104**, 9900–9905.
- Ju CL, Yoon GM, Shemansky JM, Lin DY, Ying ZI, Chang JH, Garrett WM, Kessenbrock M, Groth G, Tucker ML, Cooper B, Kieber JJ, Chang C.** 2012. CTR1 phosphorylates the central regulator EIN2 to control ethylene hormone signaling from the ER membrane to the nucleus in *Arabidopsis*. *Proceedings of the National Academy of Sciences, USA* **109**, 19486–19491.
- Jung JY, Shin R, Schachtman DP.** 2009. Ethylene mediates response and tolerance to potassium. *Plant Cell* **21**, 607–621.
- Kende H.** 1993. Ethylene biosynthesis. *Annual Review of Plant Physiology and Plant Molecular Biology* **44**, 283–307.
- Kieber JJ, Rothenberg M, Roman G, Feldmann KA, Ecker JR.** 1993. CTR1, a negative regulator of the ethylene response pathway in *Arabidopsis*, encodes a member of the RAF family of protein-kinases. *Cell* **72**, 427–441.
- Kobayashi Y, Hoekenga OA, Itoh H, Nakashima M, Saito S, Shaff JE, Maron LG, Pineros MA, Kochian LV, Koyama H.** 2007. Characterization of AtALMT1 expression in aluminium-inducible malate release and its role for rhizotoxic stress tolerance in *Arabidopsis*. *Plant Physiology* **145**, 843–852.
- Kochian LV.** 1995. Cellular mechanisms of aluminium toxicity and resistance in plants. *Annual Review of Plant Physiology and Plant Molecular Biology* **46**, 237–260.
- Kollmeier M, Felle HH, Horst WJ.** 2000. Genotypical differences in aluminium resistance of maize are expressed in the distal part of the transition zone. Is reduced basipetal auxin flow involved in inhibition of root elongation by aluminium? *Plant Physiology* **122**, 945–956.
- Leblanc A, Renault H, Lecourt J, Etienne P, Deleu C, Deunff EL.** 2008. Elongation changes of exploratory and root hair systems induced by aminocyclopropane carboxylic acid and aminoethoxyvinylglycine affect nitrate uptake and *BnNrt2.1* and *BnNrt1.1* transporter gene expression in oilseed rape. *Plant Physiology* **146**, 1928–1940.
- Lei MG, Zhu CM, Liu YD, Karthikeyan AS, Bressan RA, Raghothama KG, Liu D.** 2011. Ethylene signaling is involved in regulation of phosphate starvation-induced gene expression and production of acid phosphatases and anthocyanin in *Arabidopsis*. *New Phytologist* **189**, 1084–1095.
- Lemaire L, Deleu C, Deunff EL.** 2013. Modulation of ethylene biosynthesis by ACC and AIB reveals a structural and functional relationship between the K<sup>15</sup>NO<sub>3</sub> uptake rate and root absorbing surfaces. *Journal of Experimental Botany* **64**, 2725–2737.
- Li YS, Gao Y, Tian QY, Shi FL, Li LH, Zhang WH.** 2011. Stimulation of root acid phosphatase by phosphorus deficiency is regulated by ethylene in *Medicago falcata*. *Environmental and Experimental Botany* **71**, 114–120.
- Liang C, Piñeros MA, Tian J, Yao Z, Sun L, Liu J, Shaff J, Coluccio A, Kochian LV, Liao H.** 2013. Low pH, aluminium and phosphorus coordinately regulate malate exudation through GmALMT1 to improve soybean adaptation to acid soils. *Plant Physiology* **161**, 1347–1361.
- Ligaba A, Dreyer I, Margaryan A, Schneider DJ, Kochian L, Piñeros M.** 2013. Functional, structural and phylogenetic analysis of domains underlying the Al-sensitivity of the aluminium-activated malate/anion transporter, TaALMT1. *Plant Journal* **76**, 766–780.
- Ligaba A, Katsuhara M, Ryan PR, Shibasaka M, Matsumoto H.** 2006. The *BnALMT1* and *BnALMT2* genes from rape encode aluminium-activated malate transporters that enhance the aluminium resistance of plant cells. *Plant Physiology* **142**, 1294–1303.
- Ligaba A, Kochian LV, Pineros M.** 2009. Phosphorylation at S384 regulates the activity of the TaALMT1 malate transporter that underlies aluminium resistance in wheat. *Plant Journal* **60**, 411–423.
- Ma JF, Ryan PR, Delhaize E.** 2001. Aluminum tolerance in plants and the complexing role of organic acids. *Trends in Plant Science* **6**, 273–278.
- Martinez-Estevéz M, Loyola-Vargas VM, Hernandez-Sotomayor SMT.** 2001. Aluminum increases phosphorylation of particular proteins in cellular suspension cultures of coffee (*Coffea arabica*). *Journal of Plant Physiology* **158**, 1375–1379.
- Matsumoto H.** 2000. Cell biology of aluminum toxicity and tolerance in higher plants. *International Review of Cytology* **200**, 1–46.
- Motoda H, Sasaki T, Kano Y, Ryan PR, Delhaize E, Matsumoto H, Yamamoto Y.** 2007. The membrane topology of ALMT1, an aluminum-activated malate transport protein in wheat (*Triticum aestivum*). *Plant Signaling Behavior* **6**, 467–472.
- Nagarajan VK, Smith AP.** 2012. Ethylene's role in phosphate starvation signaling: More than just a root growth regulator. *Plant and Cell Physiology* **53**, 277–286.
- Osawa H, Matsumoto H.** 2001. Possible involvement of protein phosphorylation in aluminum-responsive malate efflux from root apex. *Plant Physiology* **126**, 411–420.
- Piñeros MA, Cancado GMA, Kochian LV.** 2008. Novel properties of the wheat aluminum tolerance organic acid transporter (TaALMT1) revealed by electrophysiological characterization in *Xenopus* oocytes: Functional and structural implications. *Plant Physiology* **147**, 2131–2146.
- Rangel AF, Rao IM, Horst WJ.** 2007. Spatial aluminum sensitivity of root apices of two common bean (*Phaseolus vulgaris* L.) genotypes with contrasting aluminum resistance. *Journal of Experimental Botany* **58**, 3895–3904.
- Rengel Z, Zhang WH.** 2003. Role of dynamics of intracellular calcium in aluminum toxicity syndrome. *New Phytologist* **159**, 295–314.
- Ryan PR, Delhaize E, Jones DL.** 2001. Function and mechanism of organic anion exudation from plant roots. *Annual Review of Plant Physiology and Plant Molecular Biology* **52**, 527–560.
- Ryan PR, Delhaize E.** 2010. The convergent evolution of aluminum resistance in plants exploits a convenient currency. *Functional Plant Biology* **37**, 275–284.

- Ryan PR, Delhaize E, Randall PJ.** 1995. Characterisation of Al-stimulated efflux of malate from the apices of Al-tolerant wheat roots. *Planta* **196**, 103–110.
- Ryan PR, Raman H, Gupta S, Sasaki T, Yamamoto Y, Delhaize E.** 2010. The multiple origins of aluminum resistance in hexaploid wheat include *Aegilops tauschii* and more recent *cis* mutations to *TaALMT1*. *Plant Journal* **64**, 446–455.
- Ryan PR, Skerrett M, Findlay GP, Delhaize E, Tyerman SD.** 1997. Aluminum activates an anion channel in the apical cells of wheat roots. *Proceedings of the National Academy of Sciences, USA* **94**, 6547–6552.
- Ryan PR, Tyerman SD, Sasaki T, Furuichi T, Yamamoto Y, Zhang WH, Delhaize E.** 2011. The identification of aluminum-resistance genes provides opportunities for enhancing crop production on acid soils. *Journal Experimental Botany* **62**, 9–20.
- Ryan PR, Ditomasso JM, Kochian LV.** 1993. Aluminum toxicity in roots: an investigation of spatial sensitivity and the role of the root cap. *Journal of Experimental Botany* **44**, 437–446.
- Sasaki T, Ryan PR, Delhaize E, Hebb DM, Ogihara Y, Kawaura K, Noda K, Kojima T, Toyoda A, Matsumoto H, Yamamoto Y.** 2006. Sequence upstream of the heat (*Triticum aestivum* L.) *ALMT1* gene and its relationship to aluminum resistance. *Plant Cell Physiology* **10**, 1343–1354.
- Sasaki T, Yamamoto Y, Ezaki B, Katsuhara M, Ahn SJ, Ryan PR, Delhaize E, Matsumoto H.** 2004. A wheat gene encoding an aluminum-activated malate transporter. *Plant Journal* **37**, 45–653.
- Sawaki Y, Iuchi S, Kobayashi Y, Ikka T, Sakurai N, Fujita M, Shinozaki K, Shibata D, Kobayashi M, Koyama H.** 2009. STOP1 regulates multiple genes that protect *Arabidopsis* from proton and aluminum toxicities. *Plant Physiology* **150**, 281–294.
- Shen H, Hou NY, Schlicht M, Wan YL, Baluska F.** 2008. Aluminum toxicity targets PIN2 in *Arabidopsis* root apices: effects on PIN2 endocytosis vesicular recycling, and polar auxin transport. *Chinese Science Bulletin* **53**, 2480–2487.
- Sivaguru M, Horst WJ.** 1998. The distal part of the transition zone is the most aluminum-sensitive apical root zone of maize. *Plant Physiology* **116**, 155–163.
- Stepanova AN, Alonso JM.** 2009. Ethylene signaling and response: where different regulatory modules meet. *Current Opinion in Plant Biology* **12**, 548–555.
- Sun P, Tian QY, Chen J, Zhang WH.** 2010. Aluminum-induced inhibition of root elongation in *Arabidopsis* is mediated by ethylene and auxin. *Journal of Experimental Botany* **61**, 347–356.
- Sun P, Tian QY, Zhao MG, Dai XY, Li LH, Huang JH, Zhang WH.** 2007. Aluminum-induced ethylene production is associated with inhibition of root elongation in *Lotus japonicus* L. *Plant and Cell Physiology* **48**, 1229–1235.
- Tian QY, Sun DH, Zhao MG, Zhang WH.** 2007. Inhibition of nitric oxide synthase (NOS) underlies aluminium-induced inhibition of root elongation in *Hibiscus moscheutos* L. *New Phytologist* **174**, 322–331.
- Tian QY, Sun P, Zhang WH.** 2009. Ethylene is involved in nitrate-dependent root growth and branching in *Arabidopsis thaliana*. *New Phytologist* **184**, 918–931.
- Wang YS, Yang ZM.** 2005. Nitric oxide reduces aluminum toxicity by preventing oxidative stress in the roots of *Cassia tora* L. *Plant Cell Physiology* **46**, 1915–1923.
- Yang Y, Wang QL, Geng MJ, Guo ZH, Zhao ZQ.** 2011. Effect of indole-3-acetic acid on aluminum-induced efflux of malic acid from wheat (*Triticum aestivum* L.). *Plant and Soil* **346**, 215–230.
- Zhang WH, Rengel Z.** 1999. Aluminum induces an increase in cytoplasmic  $Ca^{2+}$  in intact wheat roots. *Australian Journal of Plant Physiology* **26**, 401–409.
- Zhang WH, Ryan PR, Sasaki T, Yamamoto Y, Sullivan W, Tyerman SD.** 2008. Characterization of the TaALMT1 protein as an  $Al^{3+}$ -activated anion channel in transformed tobacco (*Nicotiana tabacum* L.) cells. *Plant and Cell Physiology* **49**, 1316–1330.
- Zhang WH, Ryan PR, Tyerman SD.** 2001. Malate-permeable channels and cation channels activated by aluminum in the apical cells of wheat root roots. *Plant Physiology* **125**, 1459–1472.
- Zhao MG, Tian QY, Zhang WH.** 2007. Ethylene activates a plasma membrane  $Ca^{2+}$ -permeable channel in tobacco suspension cells. *New Phytologist* **174**, 507–515.
